# Supplementary material for: Phenotypic convergence in bacterial adaptive evolution to ethanol stress
Source: PubMed Central journal article supplement (PMC4559166; doi:10.1186/s12862-015-0454-6), 2015-09-03
Supplement: 12862_2015_454_MOESM6_ESM.pdf [file 12862_2015_454_MOESM6_ESM.pdf]

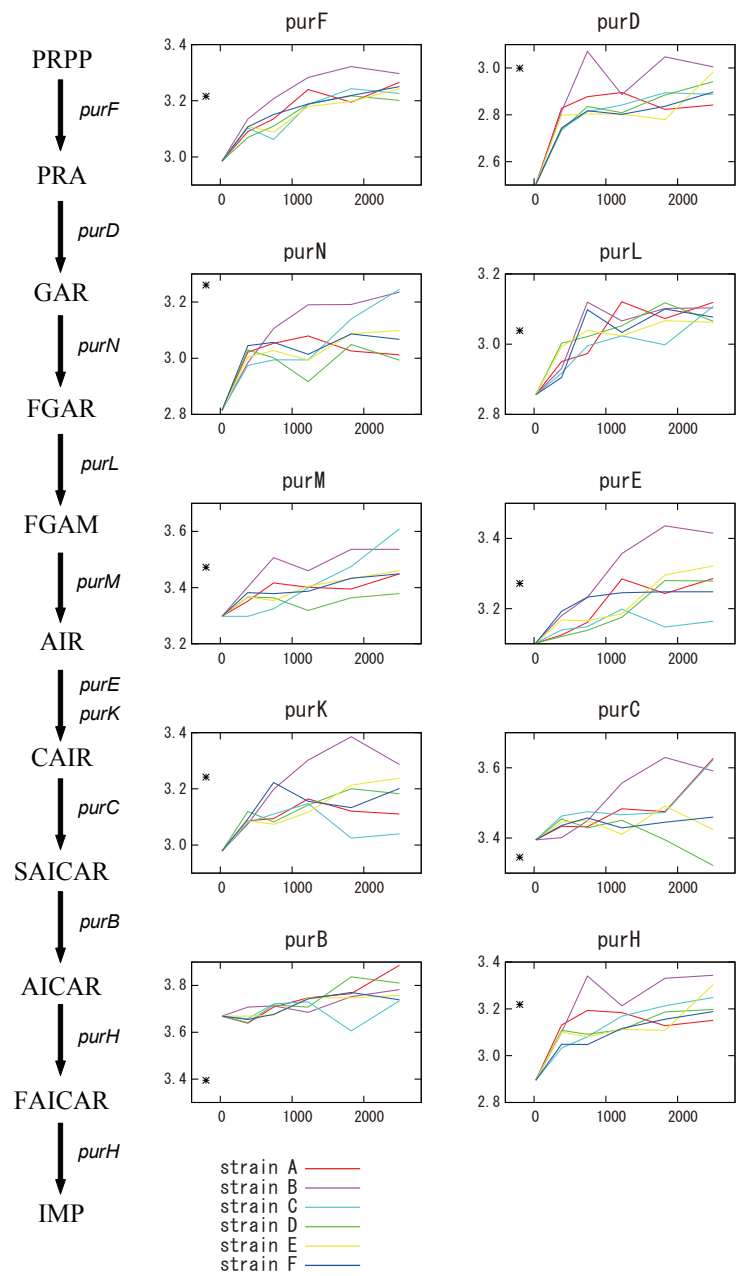

Horinouchi et al, Fig.S4
