# Supplementary material for: Phenotypic convergence in bacterial adaptive evolution to ethanol stress
Source: PubMed Central journal article supplement (PMC4559166; doi:10.1186/s12862-015-0454-6), 2015-09-03

(a)

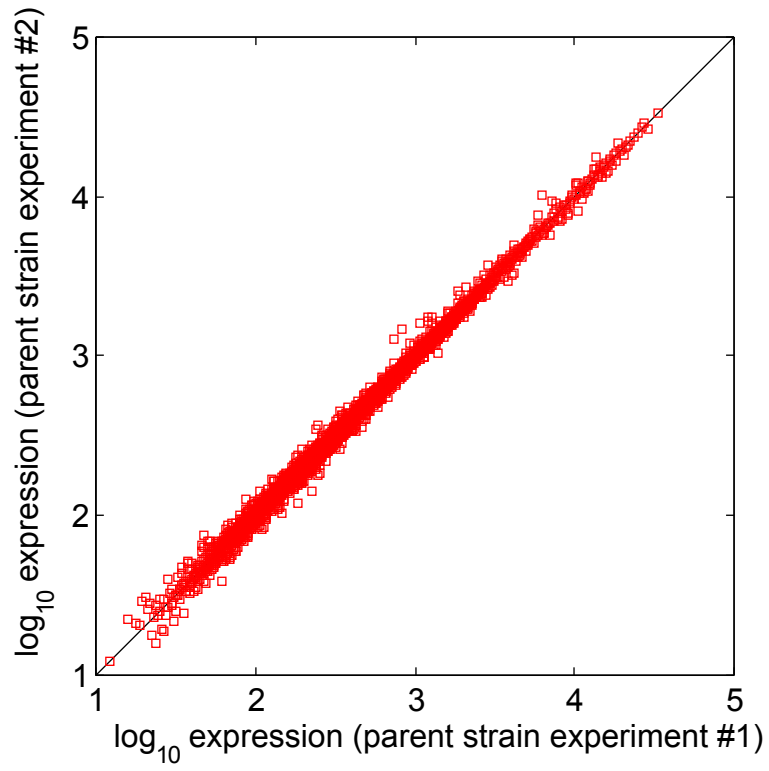

(b)

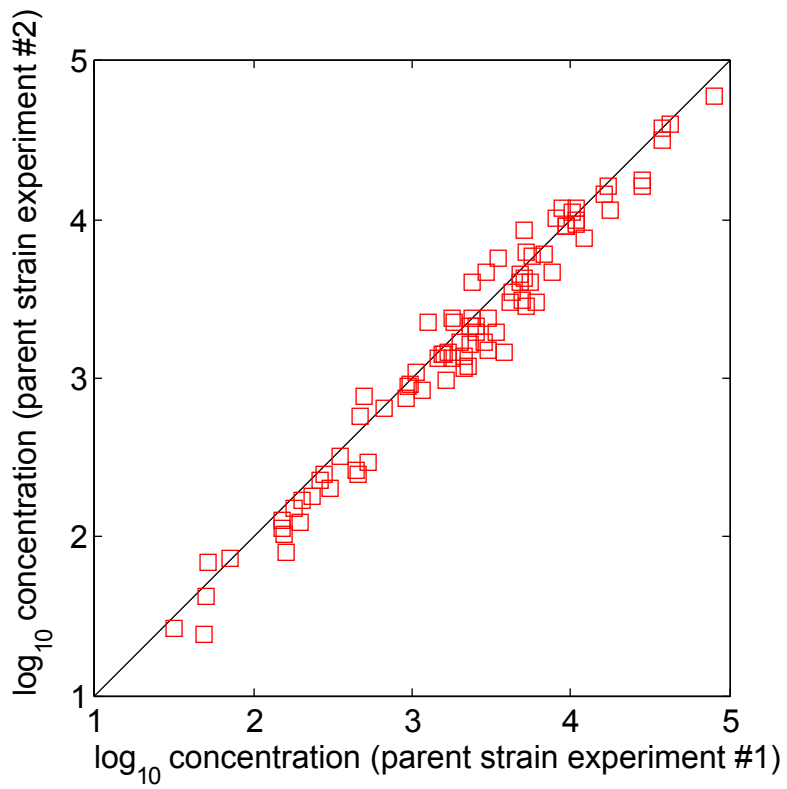

Supplement: 12862_2015_454_MOESM12_ESM.pdf [file 12862_2015_454_MOESM12_ESM.pdf]
